# Supplementary material
Source: MDPI journal article supplement (https://www.mdpi.com/2077-1444/12/8/592)
Supplement: s1 [file s1]

Archive with 2 entries (2 files):
- Supplementary S1 suvey instruments_dws.pdf
- Supplementary S2 Survey Data_dws.pdf
