# Supplementary material
Source: MDPI journal article supplement (https://www.mdpi.com/2077-1444/12/8/592)
Supplement: s1 [file s1 › Supplementary S1 suvey instruments_dws.pdf]

## Supplementary S1: Survey Instruments

To accompany the article, “Preparing to Educate for a Thriving Bivocational Ministry: A Seminary Case Study” by Darryl W. Stephens

### **One: Survey of current faculty (full-time and contingent) at Lancaster Theological Seminary**

Dates: 19 November 2020 through 3 December 2020

Administered via Moodle

N = 12

### **Survey Instrument**

#### ***Consent and Basic Information***

This survey is part of the research study, “Educating for a Thriving Bivocational Ministry,” conducted by Project Director, the Rev. Dr. Darryl W. Stephens, on behalf of Lancaster Theological Seminary. Students, faculty, staff, and trustees of Lancaster Seminary are being surveyed separately as part of this research. Your participation in this survey indicates that you are freely choosing to assume the following risks.

Your participation is voluntary; you may choose not to participate in this research study. You will be asked to share my experiences, opinions about, and perceptions of bivocational ministry. Your survey responses will be anonymous. There is no expected harm or discomfort, either psychological or physical, to the participant. If you are at all uncomfortable or do not wish to answer a question or complete a task, you do not have to do so. The estimated time to complete this survey is 15 minutes.

The researcher will answer any further questions about the research, now or during the course of the project, and can be contacted at [email address and phone number]. This project has been reviewed and approved by the Franklin & Marshall College Institutional Review Board. Questions concerning your rights as a participant in this research may also be addressed to Marcus Thomsen, Ph.D., Office of the Provost, 102C, Old Main, [email address and phone number].

Click to proceed to the appropriate survey instrument: [STUDENTS](#) or [FACULTY](#).

#### ***Consent and Basic Information***

This survey is part of the research study, “Educating for Thriving Bivocational Ministry,” conducted by Project Manager, the Rev. Dr. Darryl W. Stephens, on behalf of Lancaster Theological Seminary. Your participation in this survey indicates that you are freely choosing to assume the following risks.

Your participation is voluntary; you may choose not to participate in this research study. You will be asked to share my experiences, opinions about, and perceptions of bivocational ministry. Your survey responses will be anonymous. There is no expected harm or discomfort, either

psychological or physical, to the participant. If you are at all uncomfortable or do not wish to answer a question or complete a task, you do not have to do so. The estimated time to complete this survey is 15 minutes.

The researcher will answer any further questions about the research, now or during the course of the project, and can be contacted at [email address and phone number]. This project has been reviewed and approved by the Franklin & Marshall College Institutional Review Board. Questions concerning your rights as a participant in this research may also be addressed to Marcus Thomsen, Ph.D., Office of the Provost, 102C, Old Main, [email address and phone number].

Click to proceed to the survey [<URL>].

### ***Survey questions***

The first set of questions asks about your perceptions of bivocational ministry.

*Likert scale: strongly disagree, disagree, neutral, agree, strongly agree*

#### **Perceptions about importance**

1. Bivocational ministry is the future of pastoral ministry
2. Bivocational ministry is preferable to fully-funded ministry
3. Bivocational ministry is a short-term necessity when searching for a full-time church position
4. Bivocational ministry is more stressful than fully-funded ministry

#### **Perceptions about vocational integrity**

5. Bivocational ministry is a lesser commitment to one's call compared to fully-funded ministry
6. Bivocational ministry is an intentional career path for ministry
7. Bivocational ministry is a way to model for laity the ministry of all Christians
8. Bivocational ministry is a path for persons with insufficient skills to enter fully-funded ministry

#### **Perceptions about relevance**

9. Bivocational ministry is only relevant to small congregations that cannot afford a full-time pastor
10. Bivocational ministry is mainly for second-career pastors
11. Bivocational ministry is mainly for young, single pastors
12. Bivocational ministry is mainly for certain faith traditions
13. Bivocational ministry is mainly for certain racial or ethnic communities

The second set of questions asks about your opinion of Lancaster Theological Seminary, its educational programs and commitments.

*Likert scale: strongly disagree, disagree, neutral, agree, strongly agree*

14. I believe Lancaster Seminary already does a good job catering to the needs of bivocational students through academic curriculum
15. I believe Lancaster Seminary already does a good job catering to the needs of bivocational students through scheduling choices
16. I believe Lancaster Seminary already does a good job catering to the needs of bivocational students through student services
17. I believe Lancaster Seminary already does a good job catering to the needs of bivocational students through co-curricular offerings

**Fill in blank**

18. Identify three distinctive stressors faced by bivocational students
19. Name three existing advising and student support services for bivocational ministry
20. Name three co-curricular experiences supportive and modeling of bivocational ministry
21. How do you currently prepare students for bivocational ministry? Check as many of the following as apply:
  - a. Case studies
  - b. Assigned readings
  - c. Assignments
  - d. Classroom discussion (in-person or online)
  - e. Academic advising
  - f. Comprehensive Vocational Review
  - g. Scheduling, deadlines, and expectations for completing classroom and academic requirements
  - h. Other \_\_\_\_\_
22. Open ended response: Any additional observations, opinions, questions, or concerns relating to bivocational ministry?

**The third set of questions asks about your ministry status and demographics.**

23. I consider myself a bivocational minister (or have significant previous experience as a bivocational minister). YES or NO
24. I am ordained, licensed, or in some form of authorized ministry in my faith community
25. I identify as BIPOC or Latinx. YES or NO
26. I am affiliated with a US mainline, historically white denomination (UCC, UMC, ECUSA, PCUSA, etc.) YES or NO

## **Two: Survey of current staff at Lancaster Theological Seminary**

Dates: 19 November 2020 through 3 December 2020

Administered via Google Forms

N = 13

### **Survey Instrument**

#### ***Consent and Basic Information***

This survey is part of the research study, “Educating for a Thriving Bivocational Ministry,” conducted by Project Director, the Rev. Dr. Darryl W. Stephens, on behalf of Lancaster Theological Seminary. Students, faculty, staff, and trustees of Lancaster Seminary are being surveyed separately as part of this research. Your participation in this survey of STAFF indicates that you are freely choosing to assume the following risks.

Your participation is voluntary; you may choose not to participate in this research study. You will be asked to share my experiences, opinions about, and perceptions of bivocational ministry. Your survey responses will be anonymous. There is no expected harm or discomfort, either psychological or physical, to the participant. If you are at all uncomfortable or do not wish to answer a question or complete a task, you do not have to do so. The estimated time to complete this survey is 15 minutes.

The researcher will answer any further questions about the research, now or during the course of the project, and can be contacted at [email address and phone number]. This project has been reviewed and approved by the Franklin & Marshall College Institutional Review Board. Questions concerning your rights as a participant in this research may also be addressed to Marcus Thomsen, Ph.D., Office of the Provost, 102C, Old Main, [email address and phone number].

*Likert scale: strongly disagree, disagree, neutral, agree, strongly agree*

1. Bivocational ministry is the future of pastoral ministry
2. Bivocational ministry is preferable to fully-funded ministry
3. Bivocational ministry is a short-term necessity when searching for a full-time church position
4. Bivocational ministry is more stressful than fully-funded ministry
5. Bivocational ministry is a lesser commitment to one’s call compared to fully-funded ministry
6. Bivocational ministry is an intentional career path for ministry
7. Bivocational ministry is a way to model for laity the ministry of all Christians
8. Bivocational ministry is a path for persons with insufficient skills to enter fully-funded ministry
9. Bivocational ministry is only relevant to small congregations that cannot afford a full-time pastor
10. Bivocational ministry is mainly for second-career pastors
11. Bivocational ministry is mainly for young, single pastors

12. Bivocational ministry is mainly for certain faith traditions
13. Bivocational ministry is mainly for certain racial or ethnic communities
14. I believe Lancaster Seminary already does a good job catering to the needs of bivocational students through academic curriculum
15. I believe Lancaster Seminary already does a good job catering to the needs of bivocational students through scheduling choices
16. I believe Lancaster Seminary already does a good job catering to the needs of bivocational students through student services
17. I believe Lancaster Seminary already does a good job catering to the needs of bivocational students through co-curricular offerings
18. I believe Lancaster Seminary should improve the way it meets the needs of bivocational students through academic curriculum.
19. I believe Lancaster Seminary should improve the way it meets the needs of bivocational students through scheduling choices.
20. I believe Lancaster Seminary should improve the way it meets the needs of bivocational students through student services.
21. I believe Lancaster Seminary should improve the way it meets the needs of bivocational students through co-curricular offerings.
22. Open ended response: Identify three distinctive stressors faced by bivocational students
23. Open ended response: Name three existing advising and student support services for bivocational ministry
24. Open ended response: Name three co-curricular experiences supportive and modeling of bivocational ministry
25. How do you currently contribute to the preparation of students for bivocational ministry?  
Check as many of the following as apply:
  - Student support services
  - Lowering my expectations to accommodate students who cannot meet deadlines
  - Being flexible with requirements and demands on students
  - Offering encouragement and advice
  - Shifting my work hours and availability
  - Transforming the way I do my job with bivocational students in mind
  - Other
26. Open ended response: Any additional observations, opinions, questions, or concerns relating to bivocational ministry?
27. I consider myself a bivocational minister (or have significant previous experience as a bivocational minister). YES or NO
28. I am ordained, licensed, or in some form of authorized ministry in my faith community
29. I identify as BIPOC or Latinx. YES or NO
30. I am affiliated with a US mainline, historically white denomination (UCC, UMC, ECUSA, PCUSA, etc.) YES or NO

### **Three: Survey of current students at Lancaster Theological Seminary**

Dates: 19 November 2020 through 3 December 2020

Administered via Moodle

N = 22

#### **Survey Instrument**

##### ***Consent and Basic Information***

This survey is part of the research study, “Educating for a Thriving Bivocational Ministry,” conducted by Project Director, [name withheld for peer review], on behalf of Lancaster Seminary. Students, faculty, staff, and trustees of Lancaster Seminary are being surveyed separately as part of this research. Your participation in this survey indicates that you are freely choosing to assume the following risks.

Your participation is voluntary; you may choose not to participate in this research study. You will be asked to share my experiences, opinions about, and perceptions of bivocational ministry. Your survey responses will be anonymous. There is no expected harm or discomfort, either psychological or physical, to the participant. If you are at all uncomfortable or do not wish to answer a question or complete a task, you do not have to do so. The estimated time to complete this survey is 15 minutes.

The researcher will answer any further questions about the research, now or during the course of the project, and can be contacted at [email address and phone number]. This project has been reviewed and approved by the Franklin & Marshall College Institutional Review Board. Questions concerning your rights as a participant in this research may also be addressed to Marcus Thomsen, Ph.D., Office of the Provost, 102C, Old Main, [email address and phone number].

Click to proceed to the appropriate survey instrument: STUDENTS or FACULTY.

Click to proceed to the survey [<URL>].

##### ***Survey questions***

The first set of questions asks about your perceptions of bivocational ministry.

*Likert scale: strongly disagree, disagree, neutral, agree, strongly agree*

##### **Perceptions about importance**

1. Bivocational ministry is the future of pastoral ministry
2. Bivocational ministry is preferable to fully-funded ministry
3. Bivocational ministry is a short-term necessity when searching for a full-time church position
4. Bivocational ministry is more stressful than fully-funded ministry

##### **Perceptions about vocational integrity**

5. Bivocational ministry is a lesser commitment to one's call compared to fully-funded ministry
6. Bivocational ministry is an intentional career path for ministry
7. Bivocational ministry is a way to model for laity the ministry of all Christians
8. Bivocational ministry is a path for persons with insufficient skills to enter fully-funded ministry

#### Perceptions about relevance

9. Bivocational ministry is only relevant to small congregations that cannot afford a full-time pastor
10. Bivocational ministry is mainly for second-career pastors
11. Bivocational ministry is mainly for young, single pastors
12. Bivocational ministry is mainly for certain faith traditions
13. Bivocational ministry is mainly for certain racial or ethnic communities

The second set of questions asks about your opinion of Lancaster Theological Seminary, its educational programs and commitments.

*Likert scale: strongly disagree, disagree, neutral, agree, strongly agree*

14. I believe Lancaster Seminary already does a good job catering to the needs of bivocational students through academic curriculum
15. I believe Lancaster Seminary already does a good job catering to the needs of bivocational students through scheduling choices
16. I believe Lancaster Seminary already does a good job catering to the needs of bivocational students through student services
17. I believe Lancaster Seminary already does a good job catering to the needs of bivocational students through co-curricular offerings
18. Open ended response: Any additional observations, opinions, questions, or concerns relating to bivocational ministry?

The third set of questions asks about your career plans, current status, and demographics.

*Likert scale: strongly disagree, disagree, neutral, agree, strongly agree*

19. I consider bivocational ministry a first choice for my ministry career
20. I consider bivocational ministry a necessary compromise or steppingstone to fully-funded ministry
21. I consider bivocational ministry as not part of my career plans
22. I currently hold a paid ministry position
23. I currently hold a paid position outside of ministry
24. I have or am currently serving as a bivocational minister
25. I expect to be bivocational in ministry after graduation

#### Demographics

- 26. Indicate degree program: Masters (MDiv, MAML, etc.) *or* DMIN *or* Other (certificate, auditor, etc.)
- 27. Preferred pronouns: They/them/theirs *or* She/her/hers *or* He/him/his
- 28. I identify as BIPOC or Latinx. YES or NO
- 29. I am affiliated with a US mainline, historically white denomination (UCC, UMC, ECUSA, PCUSA, etc.) YES or NO

#### **Four: Survey of current trustees at Lancaster Theological Seminary**

Dates: 19 November 2020 through 3 December 2020

Administered via Google Forms

N = 9

#### **Survey Instrument**

##### ***Consent and Basic Information***

This survey is part of the research study, “Educating for a Thriving Bivocational Ministry,” conducted by Project Director, the Rev. Dr. Darryl W. Stephens, on behalf of Lancaster Theological Seminary. Students, faculty, staff, and trustees of Lancaster Seminary are being surveyed separately as part of this research. Your participation in this survey of TRUSTEES indicates that you are freely choosing to assume the following risks.

Your participation is voluntary; you may choose not to participate in this research study. You will be asked to share my experiences, opinions about, and perceptions of bivocational ministry. Your survey responses will be anonymous. There is no expected harm or discomfort, either psychological or physical, to the participant. If you are at all uncomfortable or do not wish to answer a question or complete a task, you do not have to do so. The estimated time to complete this survey is 15 minutes.

The researcher will answer any further questions about the research, now or during the course of the project, and can be contacted at [email address and phone number]. This project has been reviewed and approved by the Franklin & Marshall College Institutional Review Board. Questions concerning your rights as a participant in this research may also be addressed to Marcus Thomsen, Ph.D., Office of the Provost, 102C, Old Main, [email address and phone number].

*Likert scale: strongly disagree, disagree, neutral, agree, strongly agree*

1. Bivocational ministry is the future of pastoral ministry
2. Bivocational ministry is preferable to fully-funded ministry
3. Bivocational ministry is a short-term necessity when searching for a full-time church position
4. Bivocational ministry is more stressful than fully-funded ministry
5. Bivocational ministry is a lesser commitment to one’s call compared to fully-funded ministry
6. Bivocational ministry is an intentional career path for ministry
7. Bivocational ministry is a way to model for laity the ministry of all Christians
8. Bivocational ministry is a path for persons with insufficient skills to enter fully-funded ministry
9. Bivocational ministry is only relevant to small congregations that cannot afford a full-time pastor
10. Bivocational ministry is mainly for second-career pastors
11. Bivocational ministry is mainly for young, single pastors

12. Bivocational ministry is mainly for certain faith traditions
13. Bivocational ministry is mainly for certain racial or ethnic communities
14. I believe Lancaster Seminary already does a good job catering to the needs of bivocational students through academic curriculum
15. I believe Lancaster Seminary already does a good job catering to the needs of bivocational students through scheduling choices
16. I believe Lancaster Seminary already does a good job catering to the needs of bivocational students through student services
17. I believe Lancaster Seminary already does a good job catering to the needs of bivocational students through co-curricular offerings
18. I believe Lancaster Seminary should improve the way it meets the needs of bivocational students through academic curriculum.
19. I believe Lancaster Seminary should improve the way it meets the needs of bivocational students through scheduling choices.
20. I believe Lancaster Seminary should improve the way it meets the needs of bivocational students through student services.
21. I believe Lancaster Seminary should improve the way it meets the needs of bivocational students through co-curricular offerings.
22. I believe Lancaster Seminary should prioritize institutional changes in order to recruit bivocational students.
23. I believe Lancaster Seminary should prioritize institutional changes in order to create a program designed with the needs of bivocational students in mind.
24. I believe Lancaster Seminary should prioritize institutional changes in order to encourage students to consider a bivocational career path in ministry.
25. I believe Lancaster Seminary should prioritize institutional changes in order to raise the profile of bivocational ministry as a legitimate and vital form of leadership for the church.
26. Open ended response: Any additional observations, opinions, questions, or concerns relating to bivocational ministry?
