# Supplementary material
Source: MDPI journal article supplement (https://www.mdpi.com/2077-1444/12/8/592)
Supplement: s1 [file s1 › Supplementary S2 Survey Data_dws.pdf]

Supplementary S2: Survey data

To accompany the article, “Preparing to Educate for a Thriving Bivocational Ministry: A Seminary Case Study” by Darryl W. Stephens

|    | Question                                                                                            | Group    | Strongly disagree | Disagree | Neutral | Agree | Strongly agree |
|----|-----------------------------------------------------------------------------------------------------|----------|-------------------|----------|---------|-------|----------------|
| Q1 | Bivocational ministry is the future of pastoral ministry                                            | Faculty  | 0                 | 1        | 3       | 4     | 4              |
|    |                                                                                                     | Staff    | 1                 | 0        | 5       | 5     | 2              |
|    |                                                                                                     | Students | 1                 | 0        | 4       | 12    | 5              |
|    |                                                                                                     | Trustees | 0                 | 1        | 2       | 3     | 2              |
| Q2 | Bivocational ministry is preferable to fully-funded ministry                                        | Faculty  | 3                 | 7        | 1       | 1     | 0              |
|    |                                                                                                     | Staff    | 2                 | 6        | 4       | 1     | 0              |
|    |                                                                                                     | Students | 4                 | 5        | 6       | 7     | 0              |
|    |                                                                                                     | Trustees | 1                 | 6        | 1       | 0     | 0              |
| Q3 | Bivocational ministry is a short-term necessity when searching for a full-time church position      | Faculty  | 1                 | 5        | 6       | 0     | 0              |
|    |                                                                                                     | Staff    | 1                 | 3        | 7       | 2     | 0              |
|    |                                                                                                     | Students | 1                 | 9        | 9       | 3     | 0              |
|    |                                                                                                     | Trustees | 1                 | 3        | 3       | 1     | 0              |
| Q4 | Bivocational ministry is more stressful than fully-funded ministry                                  | Faculty  | 1                 | 2        | 3       | 5     | 1              |
|    |                                                                                                     | Staff    | 1                 | 1        | 3       | 5     | 3              |
|    |                                                                                                     | Students | 1                 | 6        | 7       | 5     | 3              |
|    |                                                                                                     | Trustees | 0                 | 0        | 2       | 5     | 1              |
| Q5 | Bivocational ministry is a lesser commitment to one's call compared to fully-funded ministry        | Faculty  | 7                 | 5        | 0       | 0     | 0              |
|    |                                                                                                     | Staff    | 8                 | 2        | 2       | 1     | 0              |
|    |                                                                                                     | Students | 9                 | 10       | 0       | 1     | 2              |
|    |                                                                                                     | Trustees | 4                 | 3        | 1       | 0     | 0              |
| Q6 | Bivocational ministry is an intentional career path for ministry                                    | Faculty  | 1                 | 0        | 2       | 7     | 2              |
|    |                                                                                                     | Staff    | 0                 | 0        | 3       | 8     | 2              |
|    |                                                                                                     | Students | 2                 | 4        | 4       | 9     | 3              |
|    |                                                                                                     | Trustees | 0                 | 0        | 3       | 3     | 2              |
| Q7 | Bivocational ministry is a way to model for laity the ministry of all Christians                    | Faculty  | 0                 | 2        | 2       | 6     | 2              |
|    |                                                                                                     | Staff    | 0                 | 2        | 3       | 6     | 2              |
|    |                                                                                                     | Students | 0                 | 4        | 4       | 9     | 5              |
|    |                                                                                                     | Trustees | 0                 | 0        | 4       | 3     | 1              |
| Q8 | Bivocational ministry is a path for persons with insufficient skills to enter fully-funded ministry | Faculty  | 8                 | 3        | 1       | 0     | 0              |
|    |                                                                                                     | Staff    | 8                 | 1        | 4       | 0     | 0              |
|    |                                                                                                     | Students | 12                | 5        | 2       | 3     | 0              |
|    |                                                                                                     | Trustees | 4                 | 3        | 0       | 1     | 0              |

|     |                                                                                                                                            |                 |    |    |    |   |   |
|-----|--------------------------------------------------------------------------------------------------------------------------------------------|-----------------|----|----|----|---|---|
| Q9  | <b>Bivocational ministry is only relevant to small congregations that cannot afford a full-time pastor</b>                                 | <b>Faculty</b>  | 4  | 5  | 1  | 2 | 0 |
|     |                                                                                                                                            | <b>Staff</b>    | 3  | 4  | 6  | 0 | 0 |
|     |                                                                                                                                            | <b>Students</b> | 4  | 17 | 0  | 0 | 1 |
|     |                                                                                                                                            | <b>Trustees</b> | 1  | 4  | 3  | 0 | 0 |
| Q10 | <b>Bivocational ministry is mainly for second-career pastors</b>                                                                           | <b>Faculty</b>  | 5  | 7  | 0  | 0 | 0 |
|     |                                                                                                                                            | <b>Staff</b>    | 4  | 5  | 4  | 0 | 0 |
|     |                                                                                                                                            | <b>Students</b> | 5  | 15 | 2  | 0 | 0 |
|     |                                                                                                                                            | <b>Trustees</b> | 2  | 6  | 0  | 0 | 0 |
| Q11 | <b>Bivocational ministry is mainly for young, single pastors</b>                                                                           | <b>Faculty</b>  | 6  | 6  | 0  | 0 | 0 |
|     |                                                                                                                                            | <b>Staff</b>    | 4  | 6  | 3  | 0 | 0 |
|     |                                                                                                                                            | <b>Students</b> | 7  | 15 | 0  | 0 | 0 |
|     |                                                                                                                                            | <b>Trustees</b> | 3  | 5  | 0  | 0 | 0 |
| Q12 | <b>Bivocational ministry is mainly for certain faith traditions</b>                                                                        | <b>Faculty</b>  | 5  | 6  | 1  | 0 | 0 |
|     |                                                                                                                                            | <b>Staff</b>    | 4  | 6  | 3  | 0 | 0 |
|     |                                                                                                                                            | <b>Students</b> | 5  | 16 | 1  | 0 | 0 |
|     |                                                                                                                                            | <b>Trustees</b> | 3  | 5  | 0  | 0 | 0 |
| Q13 | <b>Bivocational ministry is mainly for certain racial or ethnic communities</b>                                                            | <b>Faculty</b>  | 7  | 5  | 0  | 0 | 0 |
|     |                                                                                                                                            | <b>Staff</b>    | 4  | 6  | 3  | 0 | 0 |
|     |                                                                                                                                            | <b>Students</b> | 10 | 11 | 0  | 1 | 0 |
|     |                                                                                                                                            | <b>Trustees</b> | 6  | 2  | 0  | 0 | 0 |
| Q14 | <b>I believe Lancaster Seminary already does a good job catering to the needs of bivocational students through academic curriculum</b>     | <b>Faculty</b>  | 0  | 4  | 4  | 2 | 2 |
|     |                                                                                                                                            | <b>Staff</b>    | 0  | 3  | 6  | 4 | 0 |
|     |                                                                                                                                            | <b>Students</b> | 1  | 4  | 13 | 3 | 1 |
|     |                                                                                                                                            | <b>Trustees</b> | 0  | 1  | 6  | 1 | 0 |
| Q15 | <b>I believe Lancaster Seminary already does a good job catering to the needs of bivocational students through scheduling choices</b>      | <b>Faculty</b>  | 0  | 2  | 2  | 8 | 0 |
|     |                                                                                                                                            | <b>Staff</b>    | 0  | 3  | 5  | 4 | 1 |
|     |                                                                                                                                            | <b>Students</b> | 1  | 5  | 6  | 9 | 1 |
|     |                                                                                                                                            | <b>Trustees</b> | 0  | 0  | 2  | 5 | 1 |
| Q16 | <b>I believe Lancaster Seminary already does a good job catering to the needs of bivocational students through student services</b>        | <b>Faculty</b>  | 0  | 4  | 6  | 2 | 0 |
|     |                                                                                                                                            | <b>Staff</b>    | 1  | 1  | 10 | 1 | 0 |
|     |                                                                                                                                            | <b>Students</b> | 1  | 5  | 10 | 6 | 0 |
|     |                                                                                                                                            | <b>Trustees</b> | 0  | 0  | 7  | 1 | 0 |
| Q17 | <b>I believe Lancaster Seminary already does a good job catering to the needs of bivocational students through co-curricular offerings</b> | <b>Faculty</b>  | 0  | 3  | 5  | 4 | 0 |
|     |                                                                                                                                            | <b>Staff</b>    | 1  | 3  | 8  | 1 | 0 |
|     |                                                                                                                                            | <b>Students</b> | 1  | 4  | 14 | 3 | 0 |
|     |                                                                                                                                            | <b>Trustees</b> | 0  | 1  | 5  | 3 | 0 |
| Q18 | <b>I believe Lancaster Seminary should improve the way it meets the needs of bivocational students through academic curriculum.</b>        | <b>Staff</b>    | 0  | 0  | 4  | 7 | 2 |
|     |                                                                                                                                            | <b>Trustees</b> | 0  | 0  | 2  | 6 | 0 |

|     |                                                                                                                                                                                                 |                 |   |    |   |   |   |
|-----|-------------------------------------------------------------------------------------------------------------------------------------------------------------------------------------------------|-----------------|---|----|---|---|---|
| Q19 | <b>I believe Lancaster Seminary should improve the way it meets the needs of bivocational students through scheduling choices.</b>                                                              | <b>Staff</b>    | 0 | 0  | 6 | 6 | 1 |
|     |                                                                                                                                                                                                 | <b>Trustees</b> | 0 | 0  | 4 | 4 | 0 |
| Q20 | <b>I believe Lancaster Seminary should improve the way it meets the needs of bivocational students through student services.</b>                                                                | <b>Staff</b>    | 0 | 0  | 6 | 6 | 1 |
|     |                                                                                                                                                                                                 | <b>Trustees</b> | 0 | 0  | 4 | 4 | 0 |
| Q21 | <b>I believe Lancaster Seminary should improve the way it meets the needs of bivocational students through co-curricular offerings.</b>                                                         | <b>Staff</b>    | 0 | 0  | 5 | 7 | 1 |
|     |                                                                                                                                                                                                 | <b>Trustees</b> | 0 | 1  | 2 | 4 | 0 |
| Q22 | <b>I believe Lancaster Seminary should prioritize institutional changes in order to recruit bivocational students.</b>                                                                          | <b>Trustees</b> | 0 | 0  | 6 | 2 | 0 |
| Q23 | <b>I believe Lancaster Seminary should prioritize institutional changes in order to create a program designed with the needs of bivocational students in mind.</b>                              | <b>Trustees</b> | 0 | 1  | 3 | 3 | 1 |
| Q24 | <b>I believe Lancaster Seminary should prioritize institutional changes in order to encourage students to consider a bivocational career path in ministry.</b>                                  | <b>Trustees</b> | 0 | 1  | 3 | 3 | 1 |
| Q25 | <b>I believe Lancaster Seminary should prioritize institutional changes in order to raise the profile of bivocational ministry as a legitimate and vital form of leadership for the church.</b> | <b>Trustees</b> | 0 | 0  | 2 | 4 | 2 |
| Q19 | <b>I consider bivocational ministry a first choice for my ministry career.</b>                                                                                                                  | <b>Students</b> | 3 | 5  | 7 | 4 | 3 |
| Q20 | <b>I consider bivocational ministry a necessary compromise or steppingstone to fully-funded ministry.</b>                                                                                       | <b>Students</b> | 1 | 10 | 5 | 4 | 2 |
| Q21 | <b>I consider bivocational ministry as not part of my career plans.</b>                                                                                                                         | <b>Students</b> | 4 | 12 | 4 | 1 | 1 |

|     |                                                                                       |          | <b>Yes</b> | <b>No</b> |
|-----|---------------------------------------------------------------------------------------|----------|------------|-----------|
| Q22 | I currently hold a paid ministry position                                             | Students | 12         | 10        |
| Q23 | I currently hold I currently hold a paid position outside of ministry                 | Students | 15         | 7         |
| Q24 | I have or am currently serving as a bivocational minister.                            | Students | 12         | 10        |
| Q25 | I expect to be bivocational in ministry after graduation.                             | Students | 13         | 9         |
| Q28 | I identify as BIPOC or Latinx.                                                        | Students | 4          | 18        |
| Q25 |                                                                                       | Faculty  |            |           |
| Q29 |                                                                                       | Staff    | 2          | 8         |
| Q29 | I am affiliated with a US mainline denomination (UCC, UMC, ECUSA, etc.)               | Students | 16         | 6         |
| Q26 |                                                                                       | Faculty  | 10         | 2         |
| Q30 |                                                                                       | Staff    | 11         | 2         |
| Q27 | I consider myself a bivocational minister (or                                         | Staff    |            |           |
| Q23 | have significant previous experience as a bivocational minister).                     | Faculty  | 2          | 11        |
| Q28 | I am ordained, licensed, or in some form of authorized ministry in my faith community | Staff    | 7          | 5         |
| Q24 |                                                                                       | Faculty  | 5          | 8         |
|     |                                                                                       |          | 9          | 3         |
| Q26 |                                                                                       |          |            |           |

|     | Indicate degree program | Students | Masters (MDiv, MAML, etc.) | DMIN         | Other (certificate, auditor, etc.) |
|-----|-------------------------|----------|----------------------------|--------------|------------------------------------|
|     |                         |          | 19                         | 3            | 0                                  |
| Q27 | Preferred pronouns      | Students | They/them/theirs           | She/her/hers | He/him/his                         |
|     |                         |          | 0                          | 7            | 11                                 |

Multiple choice and free response:

**Faculty**

Q18. Identify three distinctive stressors faced by bivocational students

- Time management, class work load, and for some time passed since formal education
- scheduling, professional perceptions/stigma,
- schedule rigidity, divided focus, unrecognized competencies
- scheduling conflicts, extra work hours, balancing two jobs
- juggling responsibilities; inflexible demands from congregations (such as funerals); setting boundaries
- Family, Time, Money
- scheduling, family stress, finances
- Time management, budgeting, articulating career steps
- work/church balance; work/church/personal life balance; time to pay attention to the importance of solitude and other spiritual practices
- scheduling / time management
- time, energy, diffusion of focus
- Finances, Insufficient time, schedule conflicts

Q19. Name three existing advising and student support services for bivocational ministry

- LTS Comprehensive Vocational Review, Field Education experience, and student services
- faculty availability outside standard hours, library e-resources, FE options for solo pastors
- advisors meet on student's schedule; library scheduling flexible; Saturday worship
- don't know
- chaplains; some faculty; other students
- chaplains, academic advisors, dean
- Financial counseling, ?

Q20. Name three co-curricular experiences supportive and modeling of bivocational ministry

- Adjunct faculty
- chaplains, preachers and presiders in chapel
- field education
- don't know
- unknown to me
- not sure

Q21. How do you currently prepare students for bivocational ministry? Check as many of the following as apply:

- a. Case studies [5 responses]

- b. Assigned readings [5 responses]
- c. Assignments [5 responses]
- d. Classroom discussion (in-person or online) [7 responses]
- e. Academic advising [6 responses]
- f. Comprehensive Vocational Review [5 responses]
- g. Scheduling, deadlines, and expectations for completing classroom and academic requirements [7 responses]
- h. Other \_\_\_\_\_ [0 responses]

Q22. Open ended response: Any additional observations, opinions, questions, or concerns relating to bivocational ministry?

*Response 1:*

It is difficult to balance a full time job with studies, ministry, and family responsibilities. It is stressing to maintain high pedagogical standards while struggling with all these aspects.

*Response 2:*

Many aspects of an LTS education are applicable to both single-vocational and bi-vocational ministry.

*Response 3:*

Sometimes bivocational ministry is how congregations and the wider church can benefit from the breadth of gifts that ministers bring to the table. I quote a friend's pastoral mentor who lamented that the church recruits people to ministry for their gifts, and then promptly asks them to stop practicing that gift and "do ministry" instead. The church would best benefit by making room for the minister to serve the church as well as continue growing and practicing in their area of talent. My own mentor says that she is not Bi-vocational--she is univocational as a minister and simply serving in many spaces.

*Response 4:*

To the best of my knowledge we at Lancaster Theological Seminary are still more focused on ministry as a full time vocation than we are aware of bivocational ministry.

*Response 5:*

There are many variables in regard to this issue; it is almost impossible to generalize.

*Response 6:*

I do not recall this issue surfacing in faculty and/or staff meetings

## **Staff**

Q22. Open ended response: Identify three distinctive stressors faced by bivocational students

- time, financial, career decision
- income, divided attention, scheduling
- Loneliness, 2. Burnout 3. finances
- difficulty in finding the "other" employment; balancing competing demands on one's time; boundary setting
- Time management and balance, full time demands of each focus, being bivocational does not mean that they are financially stable
- Time, work load, multiple commitments

- Time management, systemic course offering and access to more than one internship
- Usually are solo pastors carrying the load of ministering to their congregations; needing to work to earn an income; finding the time to do school work.
- work-life-school balance, health and wellbeing, financial

Q23. Open ended response: Name three existing advising and student support services for bivocational ministry

- flexible schedule for availability
- faculty advisor, writing center, chaplains
- student debt reduction, 2. Four year MDiv program, 3. Two Seminary Chaplains
- student debt reduction program; willingness to tailor field education for these settings; directors of United Methodist and Presbyterian studies
- Academic advisor and chaplain services
- Good advisors to help students navigate their schedules; registrar who also provides student support; two part-time chaplains.
- writing center, after-hours access program for library resources, campus chaplains

Q24. Open ended response: Name three co-curricular experiences supportive and modeling of bivocational ministry

- We're just getting started with that.
- not sure
- our adjuncts provide good models for this
- Not sure
- ?
- I don't know what you mean by co-curricular.
- Cannot answer; Our co-curricular offerings are bare because we have not yet found a way to get students to participate in them

Q25. How do you currently contribute to the preparation of students for bivocational ministry? Check as many of the following as apply:

- Student support services [6 responses]
- Lowering my expectations to accommodate students who cannot meet deadlines [0 responses]
- Being flexible with requirements and demands on students [4 responses]
- Offering encouragement and advice [6 responses]
- Shifting my work hours and availability [8 responses]
- Transforming the way I do my job with bivocational students in mind [7 responses]
- Other [0 responses]

Q26. Open ended response: Any additional observations, opinions, questions, or concerns relating to bivocational ministry?

*Response 1:*

Observation: The term bi-vocational is still confusing to me in our seminary context. In many ways, it sounds like bi-vocational is used to describe people working in ministry and get a degree at the same time. At the same time could be understood as people who want to have two careers after seminary. In some cases, bi-vocational ministry is not a choice but rather an unfortunate reality of economic inequality.

My brain process bi-vocational ministry as the aftermath of the seminary experience. (aka a business owner who served a church part-time, or a pastor who works 10-15 hours a week at a non-profit or even a coffee shop. as and how to equip students for bi-vocational ministry.

Opinion: As staff (not faculty) the curricular experience would need to expand its definition of vocational ministry, (does the pastor stop being a pastor after he/she/they start working their other job?).

Integrating bi-vocational ministry into our seminary should be asking questions How can a Pastor/Faith leader/Social activist always be that in all spaces? From a Quaker theological approach, there is only one vocational calling but many ways to live it out. It's why most Quaker meetings don't have a pastor because all individuals are called to be conducted of the Spirits and voice of God.

Questions: how is bi-vocational ministry defined? Who and what do people do when doing bi-vocational ministry?

Concerns: the limited number of electives may make it difficult for bi-vocational students to get the training they need. The cost of MDiv might be a bit steep for individuals interested in bi-vocational ministry? Preparing people for bi-vocation implies to me, the seminary is exploring dual program MDiv/MSW MDiv/JD MDiv/ Non-profit Cert. etc.

*Response 2:*

Bivocational implies ministry and one other job whereas in different cultures and context the resources for the ministry are vastly different such that the two jobs (ministry and other) can very well be several jobs with full time demands

*Response 3:*

I was not familiar with the term and wish it had been defined as part of this survey

*Response 4:*

not at this time

**Students**

Q18. Open ended response: Any additional observations, opinions, questions, or concerns relating to bivocational ministry?

- Multi vocational ministry is a viable calling for serving the kingdom and maybe the way in which those who are called to serve can serve.
- With not having a denominational track or interest in chaplaincy perse I am unclear how ministry and my vocational goals will be met. I suspect this is the reason for this offering.
- Appreciate the heart to make adjustments when possible
- This should be an orientation topic for new students or prospective students.
- Bivocational ministry is not a new concept. While the term may have not be used in decades earlier, some ministers have always had two or more careers. Two key factor factors are calling and personal lifestyle. It is also necessary to define bivocational
- Thank you for leading the effort to improve LTS's preparation for bivocational ministers.
- I believe it is another form of living out a call and isn't lesser than full time ministry - just different. I believe it can be in many different forms.

### **Trustees**

Q26. Open ended response: Any additional observations, opinions, questions, or concerns relating to bivocational ministry?

#### *Response 1:*

As a member of the board of trustees, I realize I actually have very little information about how bivocational students and alumni feel about how LTS served them. I am unable to comment on recommended institutional changes without understanding better what we know about how we are currently doing with preparing students for bivocational ministry.

#### *Response 2:*

We need to raise the value of a pathway to ministry as a bivocational option. LTS could work with judicatories to create the training for these roles just like they did for alternate paths to ordination.
